# Supplementary material for: Varied nanostructures from a single multifunctional molecular material
Source: Royal Society of Chemistry journal article supplement (doi:10.1039/c0jm02302g), 2010-11-04

# Varied nanostructures from a single multifunctional molecular material

David Canevet,<sup>[a]</sup> Ángel Pérez del Pino,<sup>[b]</sup> David B. Amabilino<sup>[b]\*</sup> and Marc Sallé<sup>[a]\*</sup>

[a] Dr. D. Canevet, Prof. Marc Sallé

Université d'Angers, MOLTECH ANJOU, UMR CNRS 6200

2 boulevard Lavoisier, 49045 Angers, France.

E-mail: marc.salle@univ-angers.fr; Fax: +33 241735405; Tel: +33 241735439

[b] Dr. Á. Pérez del Pino, Prof. D. B. Amabilino

Institut de Ciència de Materials de Barcelona (CSIC)

Campus Universitari de Bellaterra

08193 Cerdanyola del Vallès, Catalonia (Spain)

E-mail: [amabilino@icmab.es](mailto:amabilino@icmab.es)

|                                                                                   |        |
|-----------------------------------------------------------------------------------|--------|
| Compound 1: Structure and <sup>1</sup> H NMR                                      | Page 2 |
| Compound 1: <sup>13</sup> C NMR and high resolution mass spectroscopy             | Page 3 |
| Compound 2: Structure and <sup>1</sup> H NMR                                      | Page 4 |
| Compound 2: <sup>13</sup> C NMR and high resolution mass spectroscopy             | Page 4 |
| Infrared absorption spectra of xerogels before and at different time after doping | Page 5 |

## Compound 1

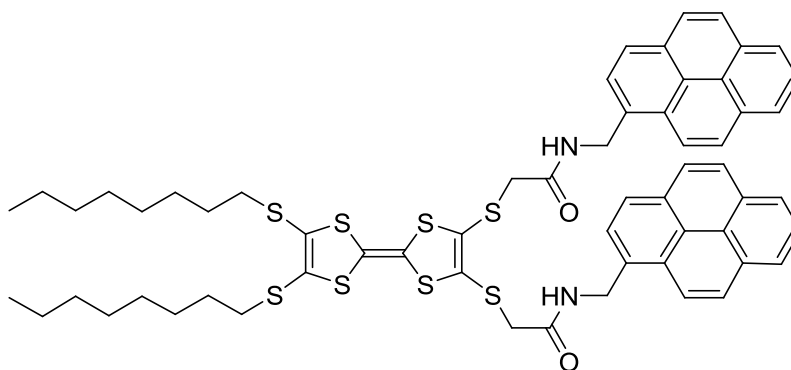

SpinWorks 3: TEST 1 [1H]

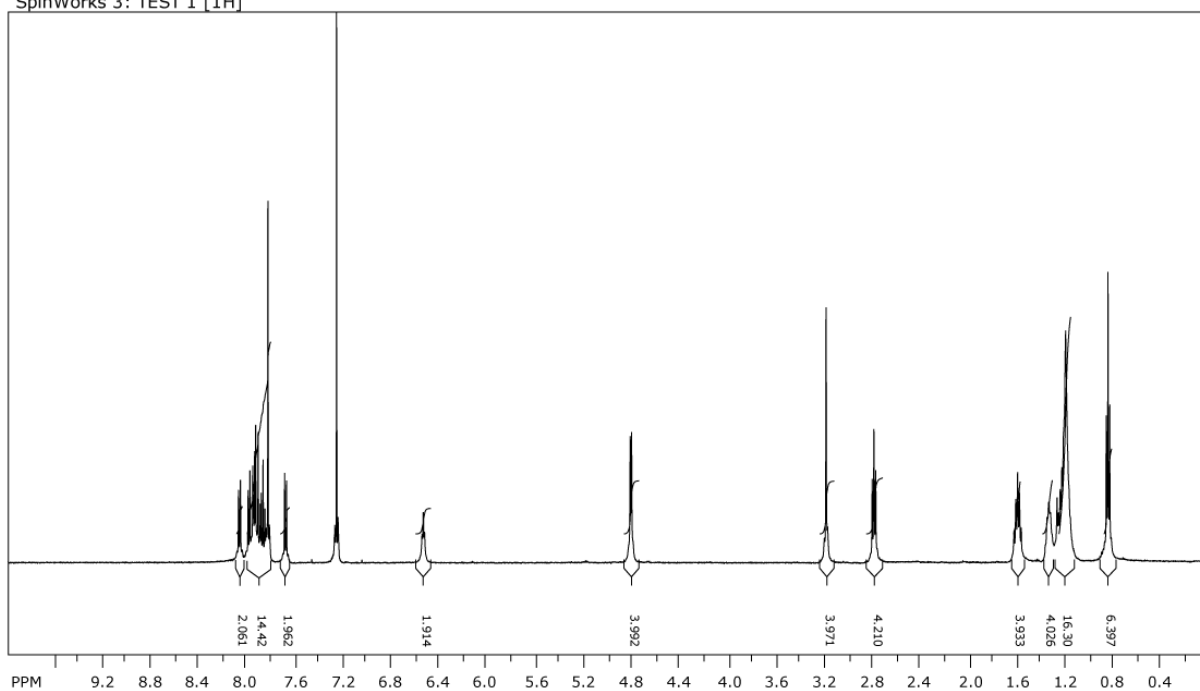

file: F:\Angers\RMN fld\dc236\1\fid exp: <zg30>  
transmitter freq.: 499.902999 MHz  
time domain size: 32768 points  
width: 6510.42 Hz = 13.0234 ppm = 0.198682 Hz/pt  
number of scans: 16

freq. of 0 ppm: 499.900032 MHz  
processed size: 16384 complex points  
LB: 0.200 GF: 0.0000  
Hz/cm: 178.492 ppm/cm: 0.35705

SpinWorks 3:

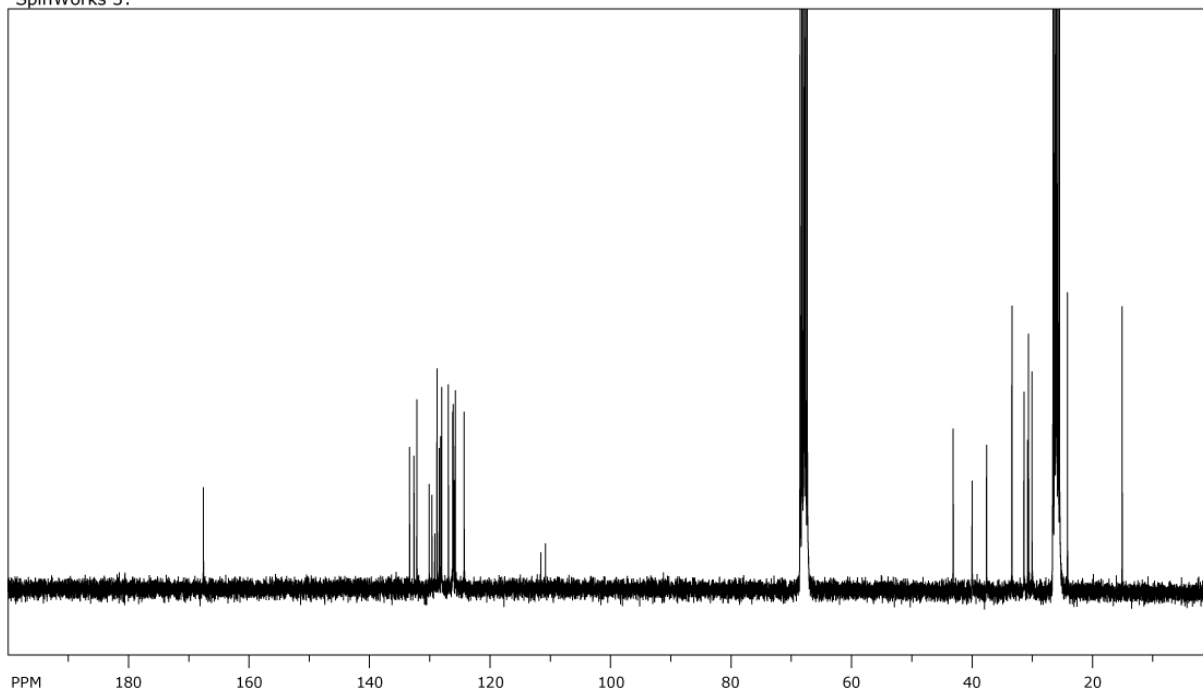

file: F:\Angers\RMN fid\dc236-THF\3\fid exp: <zpgg30>  
transmitter freq.: 75.529993 MHz  
time domain size: 65400 points  
width: 22727.27 Hz = 300.9039 ppm = 0.347512 Hz/pt  
number of scans: 20000

freq. of 0 ppm: 75.520324 MHz  
processed size: 32768 complex points  
LB: 0.000 GF: 0.0000  
Hz/cm: 539.514 ppm/cm: 7.14304

DC236\_1 #1 RT: 0.01 AV: 1 NL: 2.69E6  
T: FTMS + p ESI Full ms [200.00-2000.00]

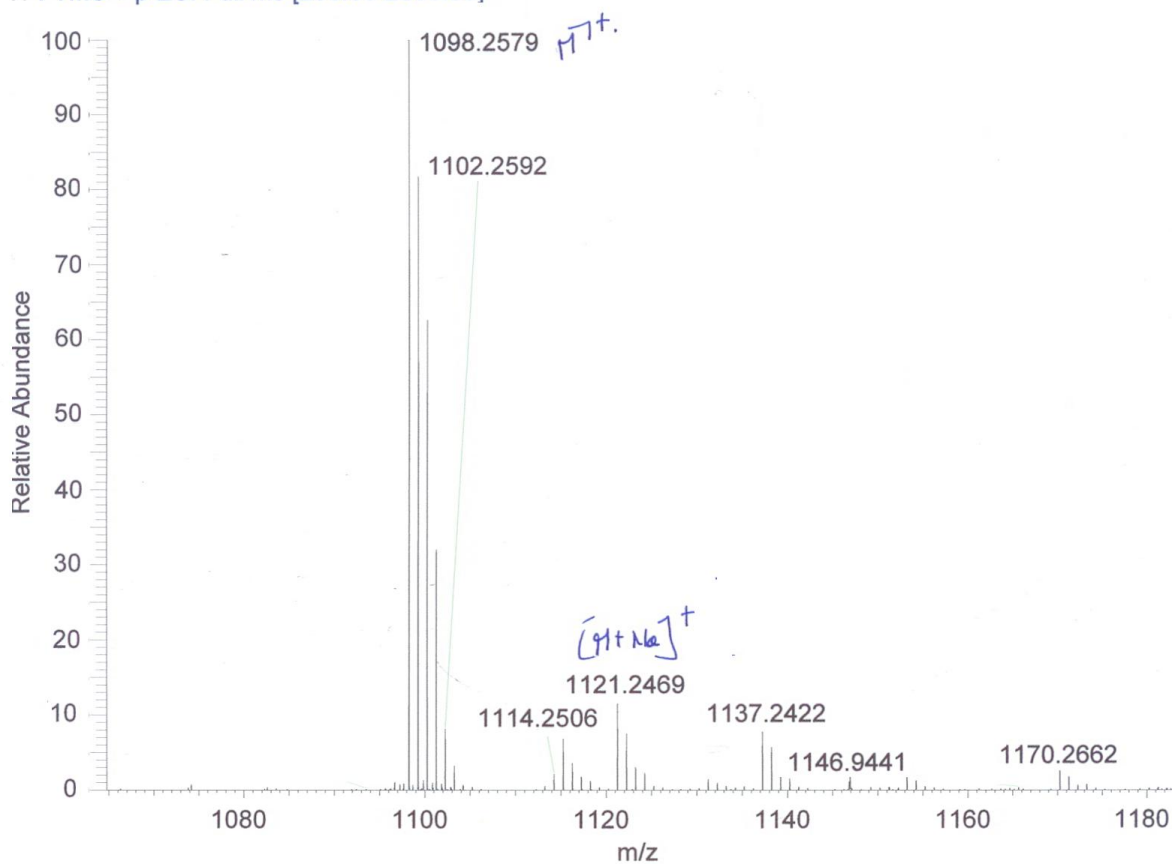

## Compound 2

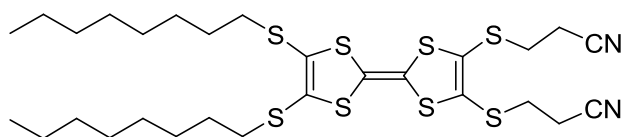

SpinWorks 3: TEST 1 [1H]

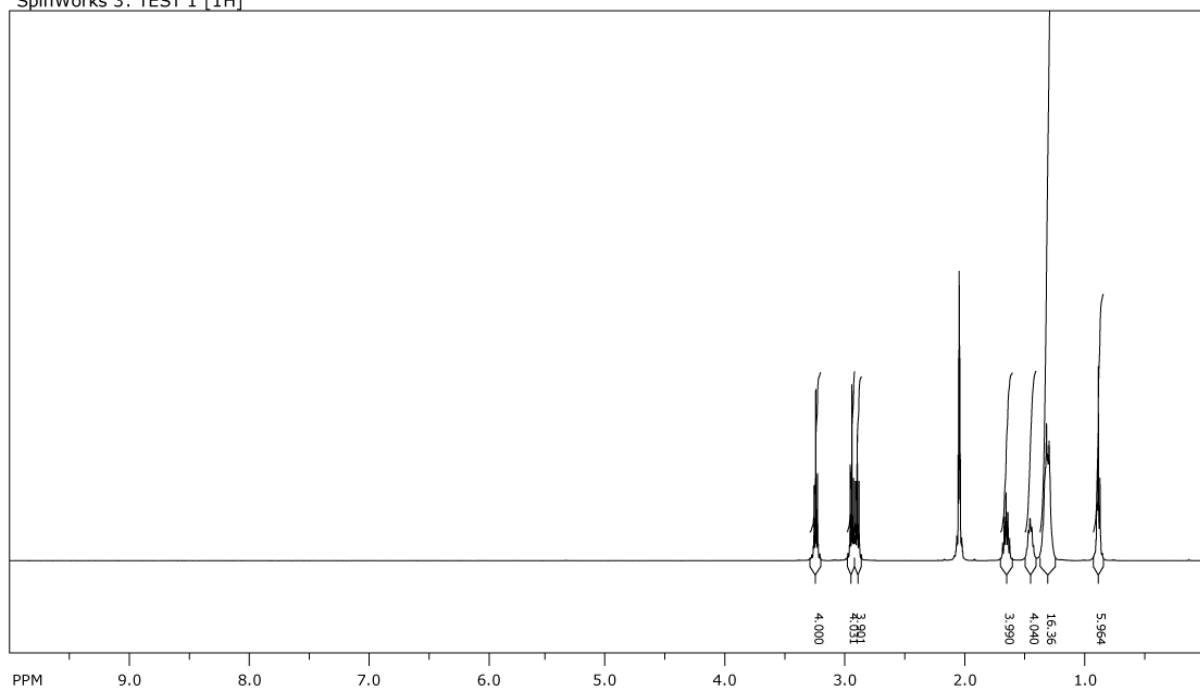

file: F:\Angers\RMN fid\dc220\1\fid exp: <zg30>  
transmitter freq.: 499.902999 MHz  
time domain size: 32768 points  
width: 6510.42 Hz = 13.0234 ppm = 0.198682 Hz/pt  
number of scans: 32

freq. of 0 ppm: 499.900013 MHz  
processed size: 16384 complex points  
LB: 0.200 GF: 0.0000  
Hz/cm: 178.690 ppm/cm: 0.35745

SpinWorks 3:

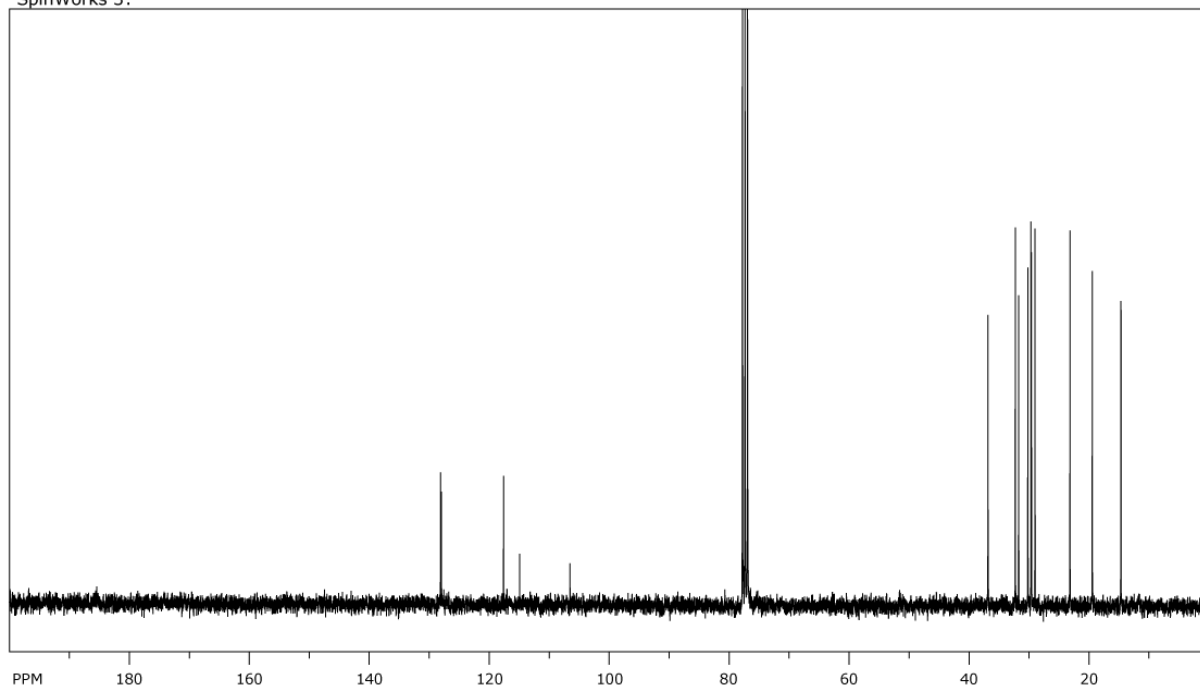

file: F:\Angers\RMN fid\dc262\2\fid exp: <zpgg30>  
transmitter freq.: 75.529993 MHz  
time domain size: 65400 points  
width: 22727.27 Hz = 300.9039 ppm = 0.347512 Hz/pt  
number of scans: 527

freq. of 0 ppm: 75.520557 MHz  
processed size: 32768 complex points  
LB: 1.000 GF: 0.0000  
Hz/cm: 539.514 ppm/cm: 7.14304

E:\dc\hot\analyses\DC235\_1  
CH3CN/H2O

08/07/2009 17:01:36

150V

DC235\_1 #20-31 RT: 0.60-0.94 AV: 12 NL: 3.93E6  
T: FTMS + p ESI Full ms [200.00-1000.00]

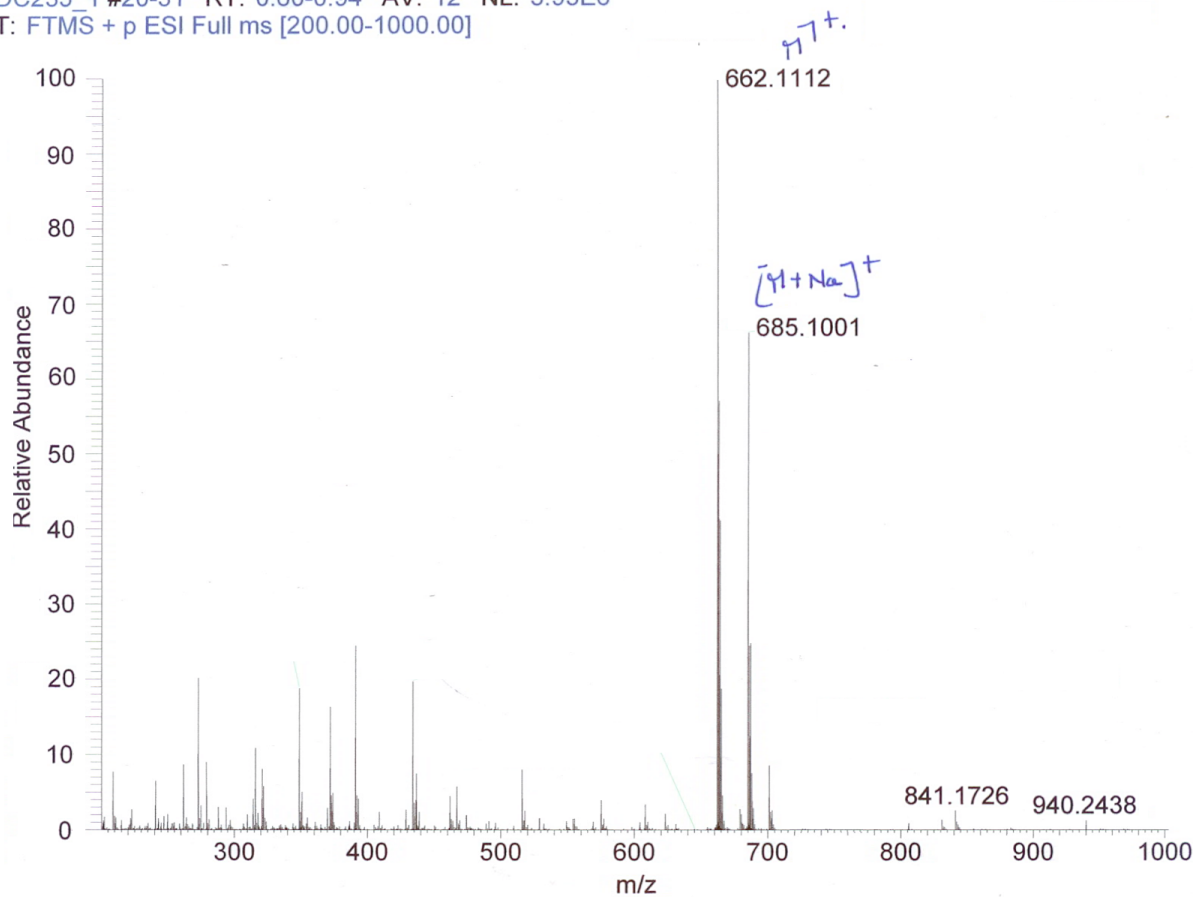

**Fig. S11** - IR absorption spectra of the xerogel of **1** formed from ODCB (top), CB (middle) and chloroform (bottom) before and at different times after doping.

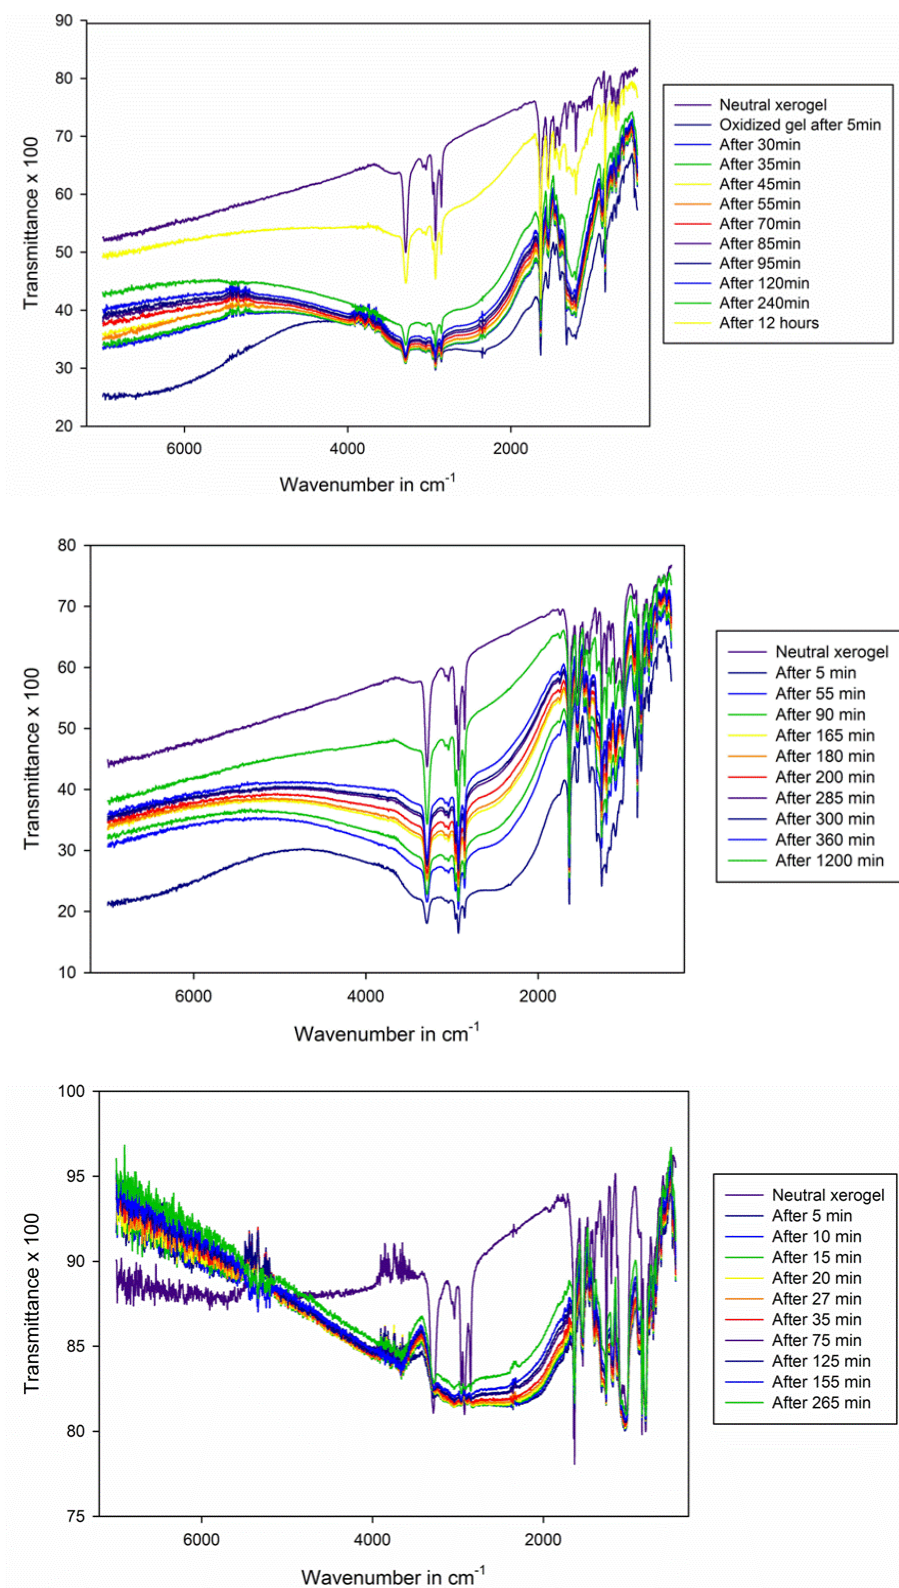

Supplement: c0jm02302g.pdf [file c0jm02302g.pdf]
